# Supplementary material
Source: MDPI journal article supplement (https://www.mdpi.com/2073-4395/13/5/1328)
Supplement: s1 [file s1]

## Supplementary Files

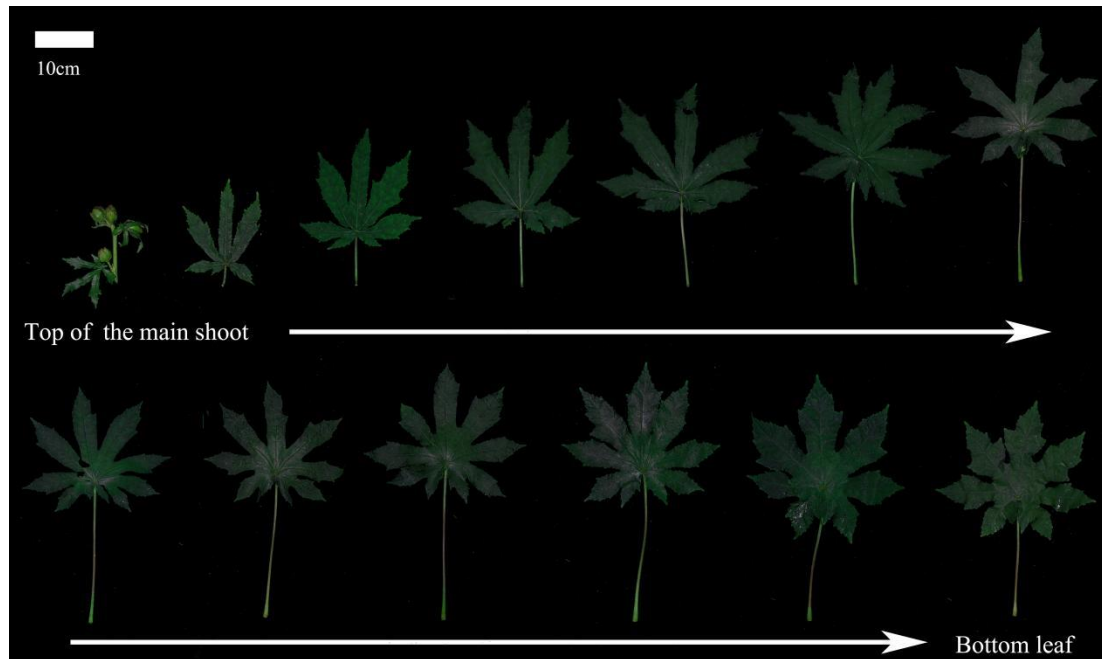

Figure S1 Morphological changes of leaves at different position on main shoot in *A. manihot*. The plants were selected at stage 503.

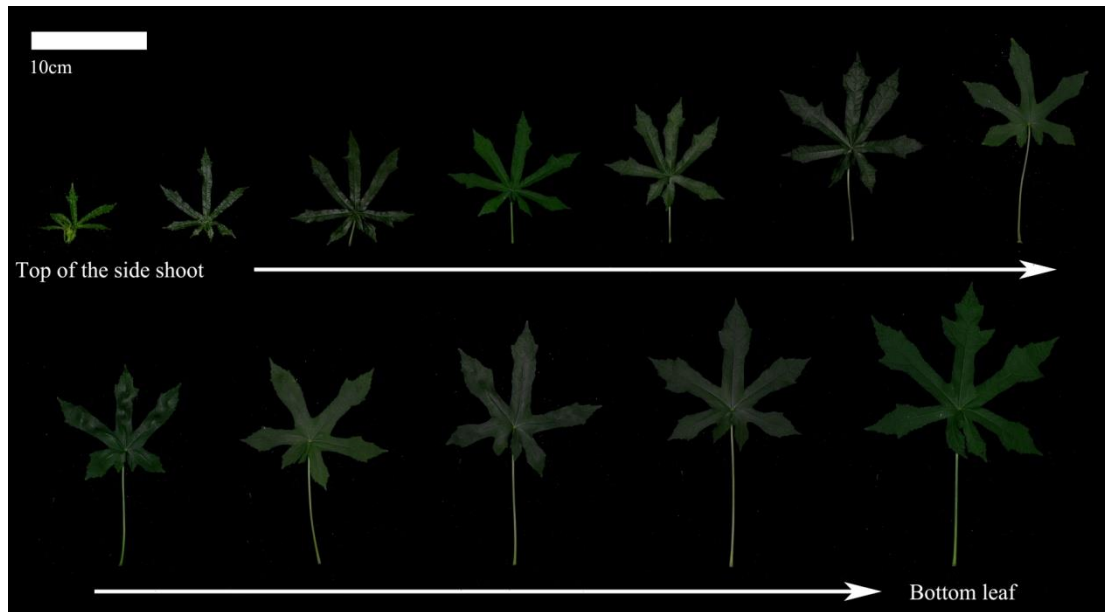

Figure S2 Morphological changes of leaves at different position on the side shoot in *A. manihot*. The plants was selected at stage 503.

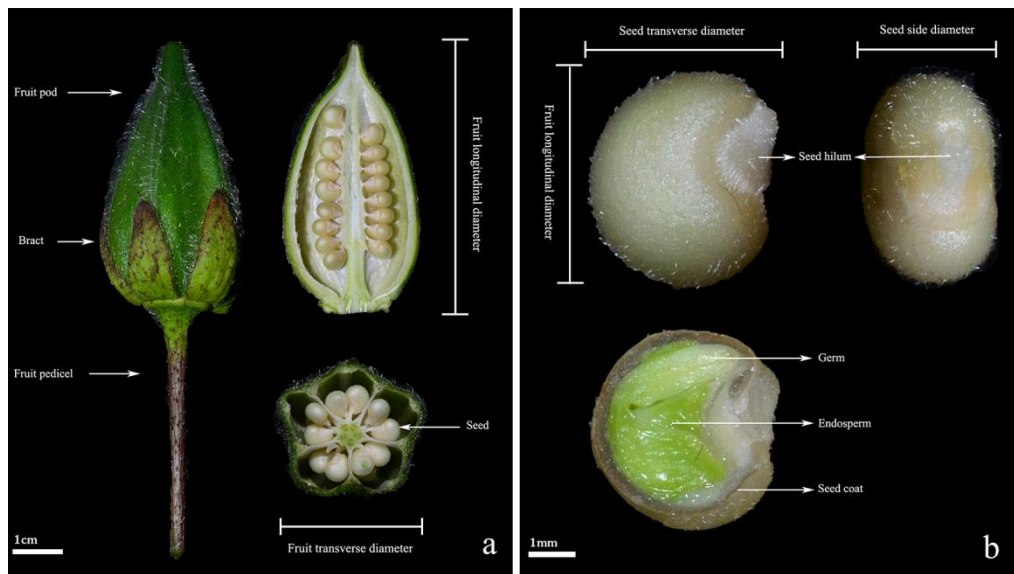

Figure S3 Morphology and structure of *A. manihot* fruit (a) and seed (b).

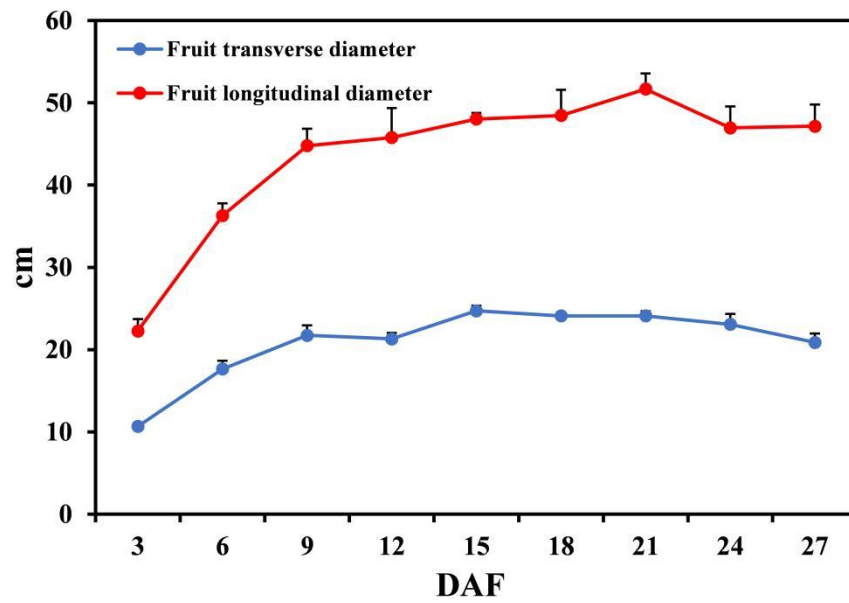

Figure S4 The transverse and longitudinal diameter of *A. manihot* fruit at different development stages. Means ( $n = 15$ ) are presented with standard errors.

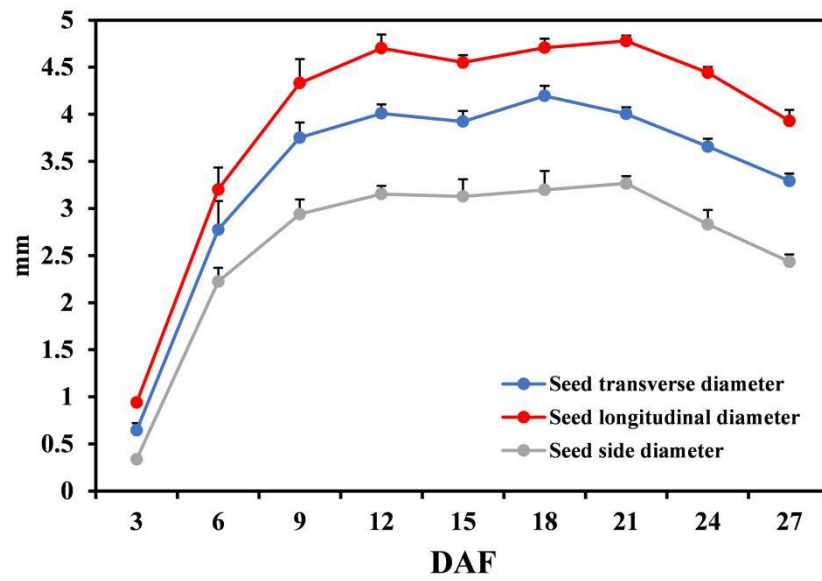

Figure S5 The transverse, longitudinal and side diameter of *A. manihot* seeds at different development stages. Means ( $n = 15$ ) are presented with standard errors.

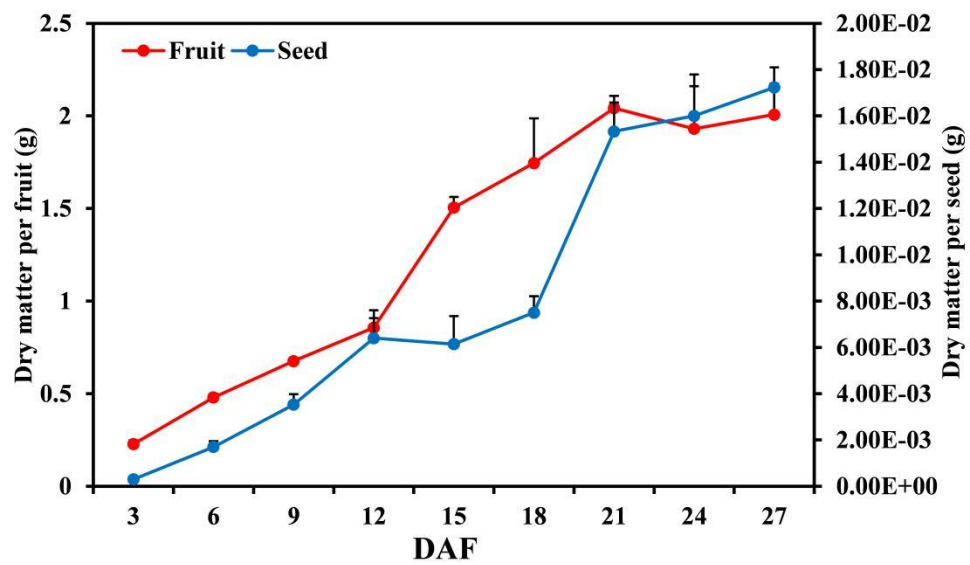

Figure S6 The dry weight of individual *A. manihot* fruit and seed at different development stages. Means (n = 15) are presented with standard errors.
